# Supplementary material for: The ascorbate biosynthesis pathway in plants is known, but there is a way to go with understanding control and functions
Source: PubMed Central journal article supplement (PMC11066809; doi:10.1093/jxb/erad505), 2024-02-01
Supplement: erad505_suppl_supplementary_table_s2.pdf [file erad505_suppl_supplementary_table_s2.pdf]

**Table S2.** Growth, development and stress responses of *Arabidopsis thaliana* ascorbate deficient (*vtc*) mutants.

A reasonably comprehensive list reports on the characteristics of *vtc* mutants are listed below. Readers are advised to check individual references for details of mutants used in each study, specific phenotypes and experimental conditions.

| Condition                               | Mutants/alleles                                                                                                    | Effect                                                                                                                                                                                                                                                      | References                                                                                                                                                                                                                                                                                                                                                                                                                      |
|-----------------------------------------|--------------------------------------------------------------------------------------------------------------------|-------------------------------------------------------------------------------------------------------------------------------------------------------------------------------------------------------------------------------------------------------------|---------------------------------------------------------------------------------------------------------------------------------------------------------------------------------------------------------------------------------------------------------------------------------------------------------------------------------------------------------------------------------------------------------------------------------|
| Photosynthesis and high light response. | All                                                                                                                | Generally, more sensitive to high light. Decreased NPQ and zeaxanthin formation in high light. Slower anthocyanin accumulation in high light.                                                                                                               | (Giacomelli <i>et al.</i> , 2006; Havaux <i>et al.</i> , 2006; Kanwischer <i>et al.</i> , 2005; Muller-Moulé <i>et al.</i> , 2002; Muller-Moulé <i>et al.</i> , 2004; Muller-Moulé <i>et al.</i> , 2003; Page <i>et al.</i> , 2012; Plumb <i>et al.</i> , 2018; Podmaniczki <i>et al.</i> , 2021; Smirnov, 2000; Toth <i>et al.</i> , 2011; Toth <i>et al.</i> , 2009; Wormuth <i>et al.</i> , 2006; Zeng <i>et al.</i> , 2018) |
| UV-C                                    | <i>vtc1</i>                                                                                                        | Increased double strand DNA breaks                                                                                                                                                                                                                          | (Filkowski <i>et al.</i> , 2004)                                                                                                                                                                                                                                                                                                                                                                                                |
| UV-B                                    | <i>vtc1-1</i> , <i>vtc2</i>                                                                                        | Increased sensitivity                                                                                                                                                                                                                                       | (Gao and Zhang, 2008; Yao <i>et al.</i> , 2015)                                                                                                                                                                                                                                                                                                                                                                                 |
| Ozone/SO <sub>2</sub>                   | <i>vtc1-1</i> , <i>vtc2-1/2-2/2-3</i> , <i>vtc2-1</i> , <i>vtc4-1</i>                                              | Increased ozone sensitivity (except <i>vtc2-2</i> ). <i>vtc1</i> is SO <sub>2</sub> sensitive (others not reported)                                                                                                                                         | (Conklin <i>et al.</i> , 2000; Conklin <i>et al.</i> , 1996)                                                                                                                                                                                                                                                                                                                                                                    |
| Temperature extremes                    | <i>vtc1-1</i> , <i>vtc2-1</i>                                                                                      | Decreased basal thermotolerance. Protection against PSII inactivation. Increased chilling sensitivity.                                                                                                                                                      | (Larkindale <i>et al.</i> , 2005; Toth <i>et al.</i> , 2011; Wang <i>et al.</i> , 2012)                                                                                                                                                                                                                                                                                                                                         |
| High salinity (NaCl)                    | <i>vtc2-4</i> , <i>vtc2-5</i> , <i>vtc1-1</i> , <i>vtc2-1</i> , <i>vtc3-1</i> , <i>vtc4-1</i>                      | More sensitive                                                                                                                                                                                                                                              | (Hoang <i>et al.</i> , 2021; Huang <i>et al.</i> , 2005; Koffler <i>et al.</i> , 2014a; Smirnov, 2000)                                                                                                                                                                                                                                                                                                                          |
| Drought and osmotic stress              | <i>vtc2-4</i> , <i>vtc2-5</i> , <i>vtc1-1</i> , <i>vtc2-1</i> , <i>vtc3-1</i> , <i>vtc4-1</i> and GalLDH knockdown | More sensitive; reduced stomatal aperture. More ABA; increased lipid oxidation, decreased tocopherol/β-carotene                                                                                                                                             | (Brossa <i>et al.</i> , 2011; Hoang <i>et al.</i> , 2021; Koffler <i>et al.</i> , 2014a; Li <i>et al.</i> , 2014; Lopez-Carbonell <i>et al.</i> , 2006; Munne-Bosch and Alegre, 2002)                                                                                                                                                                                                                                           |
| Cu or Cd toxicity                       | <i>vtc2</i> -*                                                                                                     | Tolerance unaffected or affected <i>via</i> altered GSH                                                                                                                                                                                                     | (Hoang <i>et al.</i> , 2021; Jozefczak <i>et al.</i> , 2015; Koffler <i>et al.</i> , 2014b; Peto <i>et al.</i> , 2013)                                                                                                                                                                                                                                                                                                          |
| Pathogen resistance (biotrophs)         | <i>vtc1-1</i> , <i>vtc2-1</i> , <i>vtc2-2</i> ; <i>vtc3-1</i> , <i>vtc4-1</i>                                      | Increased NPR1-mediated basal resistance to <i>Pseudomonas syringae</i> and <i>Hyaloperonospora</i> <i>via</i> H <sub>2</sub> O <sub>2</sub> -induced salicylic acid accumulation. Greater expression of PR proteins. Increased hypersensitive-like lesions | (Barth <i>et al.</i> , 2004; Brosché and Kangasjärvi, 2012; Colville and Smirnov, 2008; Mukherjee <i>et al.</i> , 2010; Pastor <i>et al.</i> , 2013; Pastori <i>et al.</i> , 2003; Pavet <i>et al.</i> , 2005)                                                                                                                                                                                                                  |
| Pathogen resistance (necrotrophs)       | <i>vtc1-1</i> , <i>vtc2-1</i>                                                                                      | More susceptible to <i>Alternaria</i>                                                                                                                                                                                                                       | (Botanga <i>et al.</i> , 2012)                                                                                                                                                                                                                                                                                                                                                                                                  |
| Ammonium hypersensitivity               | <i>vtc1</i>                                                                                                        | Root growth more inhibited by ammonium in a VTC1 specific manner.                                                                                                                                                                                           | (Barth <i>et al.</i> , 2010; Qin <i>et al.</i> , 2008; Zhang <i>et al.</i> , 2021)                                                                                                                                                                                                                                                                                                                                              |
| Growth and development                  | <i>vtc1-1</i> ; <i>vtc 2-1</i> , <i>2-2</i> , <i>2,4</i> , <i>2-5</i>                                              | Growth (rosette size) slightly less or unaffected. Early senescence of older leaves. Altered hormone responses. Flowering time accelerated.                                                                                                                 | (Barth <i>et al.</i> , 2004; Caviglia <i>et al.</i> , 2018; Dowdle <i>et al.</i> , 2007; Kerchev <i>et al.</i> , 2011; Kka <i>et al.</i> , 2018; Kotchoni <i>et al.</i> , 2009; Li <i>et al.</i> , 2016; Lim <i>et</i>                                                                                                                                                                                                          |

|                                 |                                                               |                                                                                                                                                                                                                                                                                     |                                                                                                                                                   |
|---------------------------------|---------------------------------------------------------------|-------------------------------------------------------------------------------------------------------------------------------------------------------------------------------------------------------------------------------------------------------------------------------------|---------------------------------------------------------------------------------------------------------------------------------------------------|
|                                 |                                                               | Total ascorbate deficiency in <i>vtc2/vtc5</i> double mutants arrests growth after germination. Very small size of <i>vtc2-1</i> caused by a second site mutation. <i>vtc1</i> growth defects could be related to impaired GDP-mannose production. Altered cell wall glycoproteome. | <i>al.</i> , 2016; Olmos <i>et al.</i> , 2006; Plumb <i>et al.</i> , 2018; Sultana <i>et al.</i> , 2015; Veljovic-Jovanovic <i>et al.</i> , 2001) |
| Iron nutrition                  | <i>vtc2-4</i> , <i>vtc5-1</i> , <i>vtc5-2</i> , <i>vtc4-1</i> | Decreased iron in seeds. Iron deficiency chlorosis in <i>vtc4</i> during P deficiency                                                                                                                                                                                               | (Grillet <i>et al.</i> , 2014; Nam <i>et al.</i> , 2021)                                                                                          |
| Hydrogen peroxide concentration | <i>vtc1-1</i> , <i>vtc2-1</i> , <i>vtc3-1</i> , <i>vtc4-1</i> | Increased                                                                                                                                                                                                                                                                           | (Heyneke <i>et al.</i> , 2013; Mukherjee <i>et al.</i> , 2010; Naydov <i>et al.</i> , 2010)                                                       |

## References

- Barth C, Gouzd ZA, Steele HP, Imperio RM.** 2010. A mutation in GDP-mannose pyrophosphorylase causes conditional hypersensitivity to ammonium, resulting in Arabidopsis root growth inhibition, altered ammonium metabolism, and hormone homeostasis. *Journal of Experimental Botany* **61**, 379-394.
- Barth C, Moeder W, Klessig DF, Conklin PL.** 2004. The timing of senescence and response to pathogens is altered in the ascorbate-deficient Arabidopsis mutant *vitamin C-1*. *Plant Physiol* **134**, 1784-1792.
- Botanga CJ, Bethke G, Chen Z, Gallie DR, Fiehn O, Glazebrook J.** 2012. Metabolite profiling of Arabidopsis inoculated with *Alternaria brassicicola* reveals that ascorbate reduces disease severity. *Molecular Plant-Microbe Interactions* **25**, 1628-1638.
- Brosché M, Kangasjärvi J.** 2012. Low antioxidant concentrations impact on multiple signalling pathways in *Arabidopsis thaliana* partly through NPR1. *Journal of Experimental Botany* **63**, 1849-1861.
- Brossa R, Lopez-Carbonell M, Jubany-Mari T, Alegre L.** 2011. Interplay Between Abscisic Acid and Jasmonic Acid and its Role in Water-oxidative Stress in Wild-type, ABA-deficient, JA-deficient, and Ascorbate-deficient Arabidopsis Plants. *Journal of Plant Growth Regulation* **30**, 322-333.
- Caviglia M, Mazorra Morales LM, Concellon A, Gergoff Grozoff GE, Wilson M, Foyer CH, Bartoli CG.** 2018. Ethylene signaling triggered by low concentrations of ascorbic acid regulates biomass accumulation in *Arabidopsis thaliana*. *Free Radical Biology and Medicine* **122**, 130-136.
- Colville L, Smirnov N.** 2008. Antioxidant status, peroxidase activity, and PR protein transcript levels in ascorbate-deficient *Arabidopsis thaliana vtc* mutants. *Journal of Experimental Botany* **59**, 3857-3868.
- Conklin PL, Saracco SA, Norris SR, Last RL.** 2000. Identification of ascorbic acid-deficient *Arabidopsis thaliana* mutants. *Genetics* **154**, 847-856.
- Conklin PL, Williams EH, Last RL.** 1996. Environmental stress sensitivity of an ascorbic acid-deficient Arabidopsis mutant. *Proceedings of the National Academy of Sciences of the United States of America* **93**, 9970-9974.
- Dowdle J, Ishikawa T, Gatzek S, Rolinski S, Smirnov N.** 2007. Two genes in *Arabidopsis thaliana* encoding GDP-L-galactose phosphorylase are required for ascorbate biosynthesis and seedling viability. *Plant Journal* **52**, 673-689.
- Filkowski J, Kovalchuk O, Kovalchuk I.** 2004. Genome stability of *vtc1*, *tt4*, and *tt5* *Arabidopsis thaliana* mutants impaired in protection against oxidative stress. *Plant Journal* **38**, 60-69.
- Gao Q, Zhang LX.** 2008. Ultraviolet-B-induced oxidative stress and antioxidant defense system responses in ascorbate-deficient *vtc1* mutants of *Arabidopsis thaliana*. *Journal of Plant Physiology* **165**, 138-148.

**Giacomelli L, Rudella A, van Wijk KJ.** 2006. High light response of the thylakoid proteome in *Arabidopsis* wild type and the ascorbate-deficient mutant *vtc2-2*. A comparative proteomics study. *Plant Physiol* **141**, 685-701.

**Grillet L, Ouerdane L, Flis P, Hoang MTT, Isaure MP, Lobinski R, Curie C, Mari S.** 2014. Ascorbate efflux as a new strategy for iron reduction and transport in plants. *Journal of Biological Chemistry* **289**, 2515-2525.

**Havaux M, Triantaphylides C, Genty B.** 2006. Autoluminescence imaging: a non-invasive tool for mapping oxidative stress. *Trends in Plant Science* **11**, 480-484.

**Heyneke E, Luschin-Ebengreuth N, Krajcic I, Wolkinger V, Muller M, Zechmann B.** 2013. Dynamic compartment specific changes in glutathione and ascorbate levels in *Arabidopsis* plants exposed to different light intensities. *BMC Plant Biology* **13**, 104.

**Hoang MTT, Doan MTA, Nguyen T, Tra DP, Chu TN, Dang TPT, Quach PND.** 2021. Phenotypic characterization of *Arabidopsis* ascorbate and glutathione deficient mutants under abiotic stresses. *Agronomy-Basel* **11**, 764.

**Huang CH, He WL, Guo JK, Chang XX, Su PX, Zhang LX.** 2005. Increased sensitivity to salt stress in an ascorbate-deficient *Arabidopsis* mutant. *Journal of Experimental Botany* **56**, 3041-3049.

**Jozefczak M, Bohler S, Schat H, Horemans N, Guisez Y, Remans T, Vangronsveld J, Cuypers A.** 2015. Both the concentration and redox state of glutathione and ascorbate influence the sensitivity of *Arabidopsis* to cadmium. *Annals of Botany* **116**, 601-612.

**Kanwischer M, Porfirova S, Bergmuller E, Dormann P.** 2005. Alterations in tocopherol cyclase activity in transgenic and mutant plants of *Arabidopsis* affect tocopherol content, tocopherol composition, and oxidative stress. *Plant Physiol* **137**, 713-723.

**Kerchev PI, Pellny TK, Vivancos PD, Kiddle G, Hedden P, Driscoll S, Vanacker H, Verrier P, Hancock RD, Foyer CH.** 2011. The transcription factor ABI4 is required for the ascorbic acid-dependent regulation of growth and regulation of jasmonate-dependent defense signaling pathways in *Arabidopsis*. *Plant Cell* **23**, 3319-3334.

**Kka N, Rookes J, Cahill D.** 2018. The influence of ascorbic acid on root growth and the root apical meristem in *Arabidopsis thaliana*. *Plant Physiology and Biochemistry* **129**, 323-330.

**Koffler BE, Luschin-Ebengreuth N, Stabentheiner E, Muller M, Zechmann B.** 2014a. Compartment specific response of antioxidants to drought stress in *Arabidopsis*. *Plant Science* **227**, 133-144.

**Koffler BE, Polanschutz L, Zechmann B.** 2014b. Higher sensitivity of *pad2-1* and *vtc2-1* mutants to cadmium is related to lower subcellular glutathione rather than ascorbate contents. *Protoplasma* **251**, 755-769.

**Kotchoni SO, Larrimore KE, Mukherjee M, Kempinski CF, Barth C.** 2009. Alterations in the endogenous ascorbic acid content affect flowering time in *Arabidopsis*. *Plant Physiol* **149**, 803-815.

**Larkindale J, Hall JD, Knight MR, Vierling E.** 2005. Heat stress phenotypes of *Arabidopsis* mutants implicate multiple signaling pathways in the acquisition of thermotolerance. *Plant Physiol* **138**, 882-897.

**Li B, Yang YP, Yu CM, Li SM, Chen J, Liu X, Qin HJ, Wang DW.** 2014. Partial suppression of L-galactono-1,4-lactone dehydrogenase causes significant reduction in leaf water loss through decreasing stomatal aperture size in *Arabidopsis*. *Plant Growth Regulation* **72**, 171-179.

**Li SH, Wang J, Yu YW, Wang FR, Dong JG, Huang RF.** 2016. D27E mutation of VTC1 impairs the interaction with CSN5B and enhances ascorbic acid biosynthesis and seedling growth in *Arabidopsis*. *Plant Molecular Biology* **92**, 473-482.

**Lim B, Smirnoff N, Cobbett CS, Golz JF.** 2016. Ascorbate-deficient *vtc2* mutants in *Arabidopsis* do not exhibit decreased growth. *Frontiers in Plant Science* **7**, 1025.

**Lopez-Carbonell M, Munne-Bosch S, Alegre L.** 2006. The ascorbate-deficient *vtc1* *Arabidopsis* mutant shows altered ABA accumulation in leaves and chloroplasts. *Journal of Plant Growth Regulation* **25**, 137-144.

**Mukherjee M, Larrimore KE, Ahmed NJ, Bedick TS, Barghouthi NT, Traw MB, Barth C.** 2010. Ascorbic acid deficiency in *Arabidopsis* induces constitutive priming that is dependent on hydrogen peroxide, salicylic acid, and the NPR1 gene. *Molecular Plant-Microbe Interactions* **23**, 340-351.

**Muller-Moulé P, Conklin PL, Niyogi KK.** 2002. Ascorbate deficiency can limit violaxanthin de-epoxidase activity *in vivo*. *Plant Physiol* **128**, 970-977.

**Muller-Moulé P, Golan T, Niyogi KK.** 2004. Ascorbate-deficient mutants of *Arabidopsis* grow in high light despite chronic photooxidative stress. *Plant Physiol* **134**, 1163-1172.

**Muller-Moulé P, Havaux M, Niyogi KK.** 2003. Zeaxanthin deficiency enhances the high light sensitivity of an ascorbate-deficient mutant of *Arabidopsis*. *Plant Physiol* **133**, 748-760.

**Munne-Bosch S, Alegre L.** 2002. Interplay between ascorbic acid and lipophilic antioxidant defences in chloroplasts of water-stressed *Arabidopsis* plants. *FEBS Letters* **524**, 145-148.

**Nam H-I, Shahzad Z, Dorone Y, Clowes S, Zhao K, Bouain N, Lay-Pruitt KS, Rhee SY, Rouached H.** 2021. Interdependent iron and phosphorus availability controls photosynthesis through retrograde signaling. *Nature Communications* **12**, 7211.

**Naydov IA, Mudrik VA, Ivanov BN.** 2010. Light-induced hydrogen peroxide dynamics in protoplasts from leaves of both wild-type *Arabidopsis* and its mutant deficient in ascorbate biosynthesis. *Doklady Biochemistry and Biophysics* **432**, 137-140.

**Olmos E, Kiddle G, Pellny TK, Kumar S, Foyer CH.** 2006. Modulation of plant morphology, root architecture, and cell structure by low vitamin C in *Arabidopsis thaliana*. *Journal of Experimental Botany* **57**, 1645-1655.

**Page M, Sultana N, Paszkiewicz K, Florance H, Smirnoff N.** 2012. The influence of ascorbate on anthocyanin accumulation during high light acclimation in *Arabidopsis thaliana*: further evidence for redox control of anthocyanin synthesis. *Plant Cell and Environment* **35**, 388-404.

**Pastor V, Luna E, Ton J, Cerezo M, García-Agustín P, Flors V.** 2013. Fine tuning of reactive oxygen species homeostasis regulates primed immune responses in *Arabidopsis*. *Molecular Plant-Microbe Interactions* **26**, 1334-1344.

**Pastori GM, Kiddle G, Antoniw J, Bernard S, Veljovic-Jovanovic S, Verrier PJ, Noctor G, Foyer CH.** 2003. Leaf vitamin C contents modulate plant defense transcripts and regulate genes that control development through hormone signaling. *Plant Cell* **15**, 939-951.

**Pavet V, Olmos E, Kiddle G, Mowla S, Kumar S, Antoniw J, Alvarez ME, Foyer CH.** 2005. Ascorbic acid deficiency activates cell death and disease resistance responses in *Arabidopsis*. *Plant Physiol* **139**, 1291-1303.

**Peto A, Lehotai N, Feigl G, Tugyi N, Ördög A, Gémes K, Tari I, Erdei L, Kolbert Z.** 2013. Nitric oxide contributes to copper tolerance by influencing ROS metabolism in *Arabidopsis*. *Plant Cell Reports* **32**, 1913-1923.

**Plumb W, Townsend AJ, Rasool B, Alomrani S, Razak N, Karpinska B, Ruban AV, Foyer CH.** 2018. Ascorbate-mediated regulation of growth, photoprotection, and photoinhibition in *Arabidopsis thaliana*. *Journal of Experimental Botany* **69**, 2823-2835.

**Podmaniczki A, Nagy V, Vidal-Meireles A, Toth D, Patai R, Kovacs L, Toth SZ.** 2021. Ascorbate inactivates the oxygen-evolving complex in prolonged darkness. *Physiologia Plantarum* **171**, 232-245.

**Qin C, Qian WQ, Wang WF, Wu Y, Yu CM, Jiang XH, Wang DW, Wu P.** 2008. GDP-mannose pyrophosphorylase is a genetic determinant of ammonium sensitivity in *Arabidopsis thaliana*. *Proceedings of the National Academy of Sciences of the United States of America* **105**, 18308-18313.

**Smirnoff N.** 2000. Ascorbate biosynthesis and function in photoprotection. *Philosophical Transactions of the Royal Society B-Biological Sciences* **355**, 1455-1464.

**Sultana N, Florance HV, Johns A, Smirnoff N.** 2015. Ascorbate deficiency influences the leaf cell wall glycoproteome in *Arabidopsis thaliana*. *Plant Cell and Environment* **38**, 375-384.

**Toth SZ, Nagy V, Puthur JT, Kovacs L, Garab G.** 2011. The physiological role of ascorbate as Photosystem II electron donor: protection against photoinactivation in heat-stressed leaves. *Plant Physiol* **156**, 382-392.

- Toth SZ, Puthur JT, Nagy V, Garab G.** 2009. Experimental evidence for ascorbate-dependent electron transport in leaves with inactive oxygen-evolving complexes. *Plant Physiol* **149**, 1568-1578.
- Veljovic-Jovanovic SD, Pignocchi C, Noctor G, Foyer CH.** 2001. Low ascorbic acid in the vtc-1 mutant of arabidopsis is associated with decreased growth and intracellular redistribution of the antioxidant system. *Plant Physiol* **127**, 426-435.
- Wang LY, Zhang QY, Wang F, Meng X, Meng QW.** 2012. Ascorbate plays a key role in alleviating low temperature-induced oxidative stress in Arabidopsis. *Photosynthetica* **50**, 602-612.
- Wormuth D, Baier M, Kandlbinder A, Scheibe R, Hartung W, Dietz KJ.** 2006. Regulation of gene expression by photosynthetic signals triggered through modified CO<sub>2</sub> availability. *BMC Plant Biology* **6**.
- Yao YN, You JJ, Ou YB, Ma JB, Wu XL, Xu G.** 2015. Ultraviolet-B protection of ascorbate and tocopherol in plants related with their function on the stability on carotenoid and phenylpropanoid compounds. *Plant Physiology and Biochemistry* **90**, 23-31.
- Zeng LD, Li M, Chow WS, Peng CL.** 2018. Susceptibility of an ascorbate-deficient mutant of Arabidopsis to high-light stress. *Photosynthetica* **56**, 427-432.
- Zhang L, Song HY, Li BH, Wang M, Di DW, Lin XY, Kronzucker HJ, Shi WM, Li GJ.** 2021. Induction of S-nitrosoglutathione reductase protects root growth from ammonium toxicity by regulating potassium homeostasis in Arabidopsis and rice. *Journal of Experimental Botany* **72**, 4548-4564.
